# Supplementary material for: BCAS2 Enhances Carcinogenic Effects of Estrogen Receptor Alpha in Breast Cancer Cells
Source: PubMed Central journal article supplement (PMC6412365; doi:10.3390/ijms20040966), 2019-02-22
Supplement: ijms-20-00966-s001.pdf [file ijms-20-00966-s001.pdf]

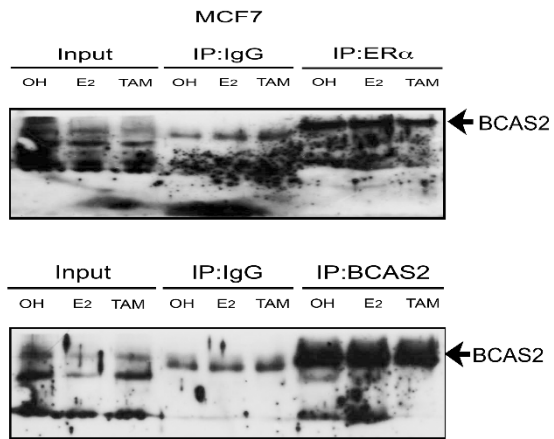

Supplementary Figure S1. Coimmunoprecipitation assays in MCF7 cells in the presence of ethanol (OH), E2 (10nM) or TAM (100nM) showing interaction in the presence or absence of ligand. Input refers to pre-clear protein extracts.

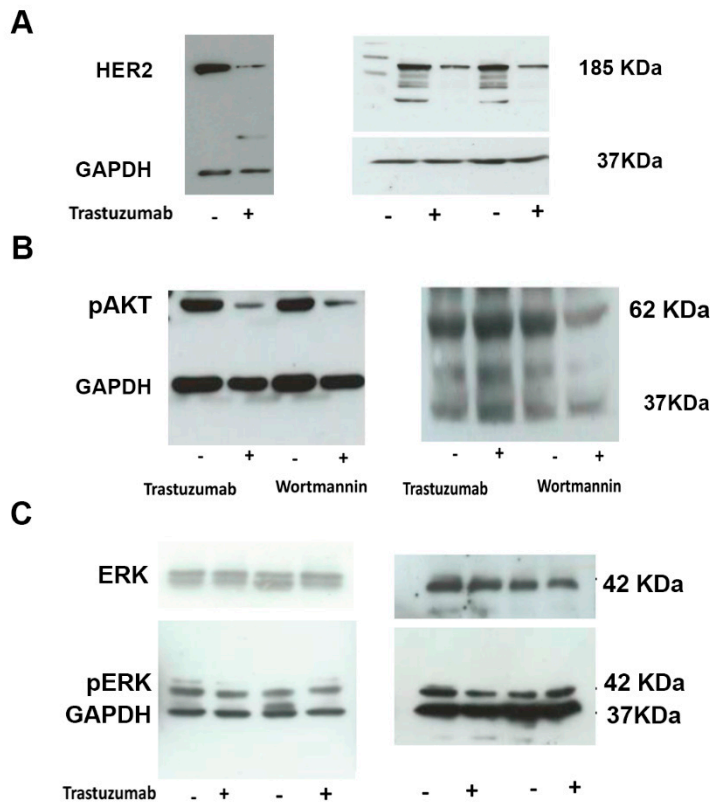

Supplementary Figure S2. Raw western blot data studies using inhibitors of signal transduction pathways. (A) Three independent assays showing HER2 expression in SK-BR-3 cells in the presence or absence of the HER 2 inhibitor trastuzumab. (B) Two independent assays showing AKT and pAKT expression in MCF7 cells in the presence and absence of Trastuzumab and AKT activation inhibitor wortmannin. (C) Two independent assays showing ERK and pERK expression in MCF7 cells in the presence or absence of MEK inhibitor PD98059.
